# Supplementary material for: Effect of high energy proton irradiation on MAPbI3 films for space applications observed by micro-Raman spectroscopy
Source: Royal Society of Chemistry journal article supplement (doi:10.1039/d0ma00583e), 2020-01-01
Supplement: d0ma00583e1.pdf [file d0ma00583e1.pdf]

## Supporting information

### Proton irradiation on MAPbI<sub>3</sub> films for space applications: a comprehensive Micro-Raman spectroscopy study.

Walter O. Herrera Martínez,<sup>\*a</sup> Paula Giudici<sup>b</sup>, Natalia Correa Guerrero<sup>a</sup>, Martín Alurralde<sup>a</sup> and M. Dolores Perez<sup>c</sup>

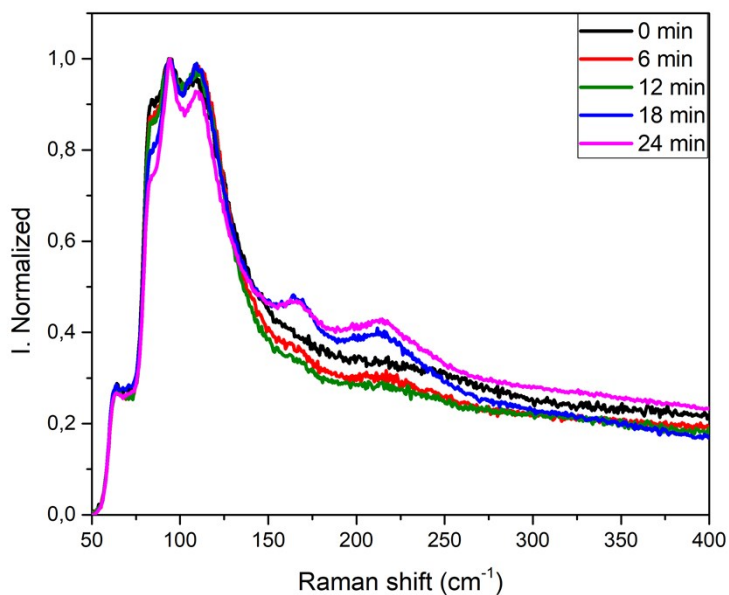

Figure 1 Raman spectra showing degradation in the same position of CH<sub>3</sub>NH<sub>3</sub>PbI<sub>3</sub> layer after prolonged exposition with laser power density 250 W/cm<sup>2</sup> in ambient conditions.

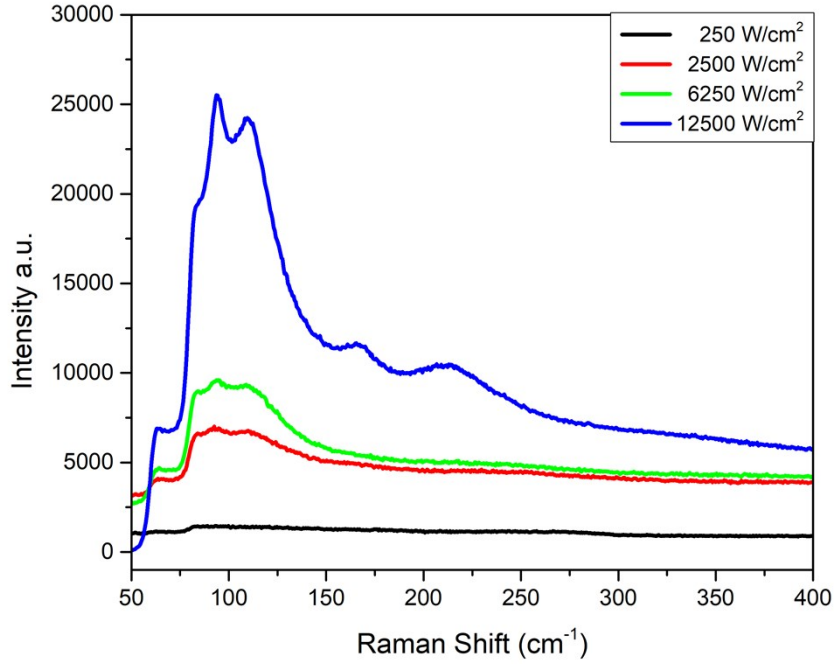

Figure 2 Raman spectra for degradation in  $\text{CH}_3\text{NH}_3\text{PbI}_3$  sample for different laser power density.

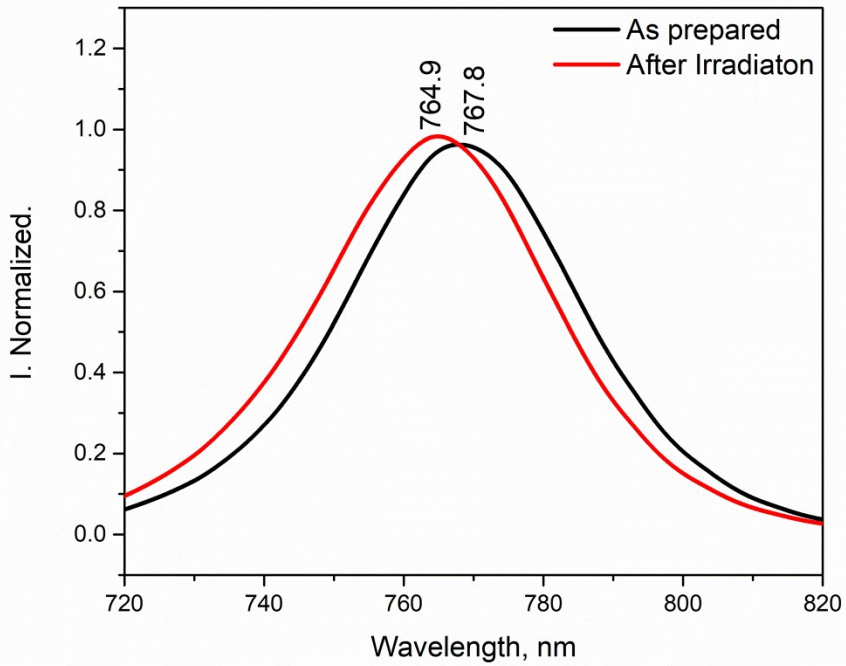

Figure 3. PL spectra from the  $\text{MAPbI}_3$  thin films as prepared and after irradiation.
